# Supplementary material for: Transient electronic and vibrational absorption studies of the photo-Claisen and photo-Fries rearrangements
Source: Royal Society of Chemistry journal article supplement (doi:10.1039/c3sc52893f), 2013-11-27
Supplement: c3sc52893f.pdf [file c3sc52893f.pdf]

## Supplementary Information

### Transient Absorption Studies of the Photo-Claisen and Photo-Fries Rearrangements

Stephanie J. Harris,<sup>a</sup> Daniel Murdock,<sup>a</sup> Michael P. Grubb,<sup>a</sup> Gregory M. Greetham,<sup>b</sup> Ian P. Clark,<sup>b</sup> Michael Towrie<sup>b</sup> and Michael N. R. Ashfold.<sup>a\*</sup>

<sup>a</sup> School of Chemistry, University of Bristol, Bristol, BS8 1TS, UK

<sup>b</sup> Central Laser Facility, Research Complex at Harwell, Science and Technology Facilities Council, Rutherford Appleton Laboratory, Harwell Science and Innovation Campus, Didcot, Oxfordshire, OX11 0QX, UK

#### Kinetic Modelling Equations

$$[\text{ExcitedState}](t) = X_1 e^{-k_1 t} \quad (1)$$

$$[\text{PhO}^\bullet + \text{R}^\bullet](t) = \frac{k_1 X_1}{k_2 - k_1 + k_3} (e^{-k_1 t} - e^{-(k_2+k_3)t}) \quad (2)$$

$$[\text{Recombination Products}](t) = \frac{k_2 X_1}{k_2 + k_3} - \frac{k_2 X_1 e^{-k_1 t}}{(k_2 - k_1 + k_3)} + \frac{k_1 k_2 X_1 e^{-(k_2+k_3)t}}{(k_2 + k_3)(k_2 - k_1 + k_3)} \quad (3)$$

$$[\text{PhO}_e + \text{R}_e](t) = \frac{k_3 X_1}{k_2 + k_3} - \frac{k_3 X_1 e^{-k_1 t}}{(k_2 - k_1 + k_3)} + \frac{k_1 k_3 X_1 e^{-(k_2+k_3)t}}{(k_2 + k_3)(k_2 - k_1 + k_3)} \quad (4)$$

$$\text{Observed radical signal} = [\text{PhO}^\bullet + \text{R}^\bullet](t) + [\text{PhO}_e + \text{R}_e](t) \quad (5)$$

## UV/Visible Spectra

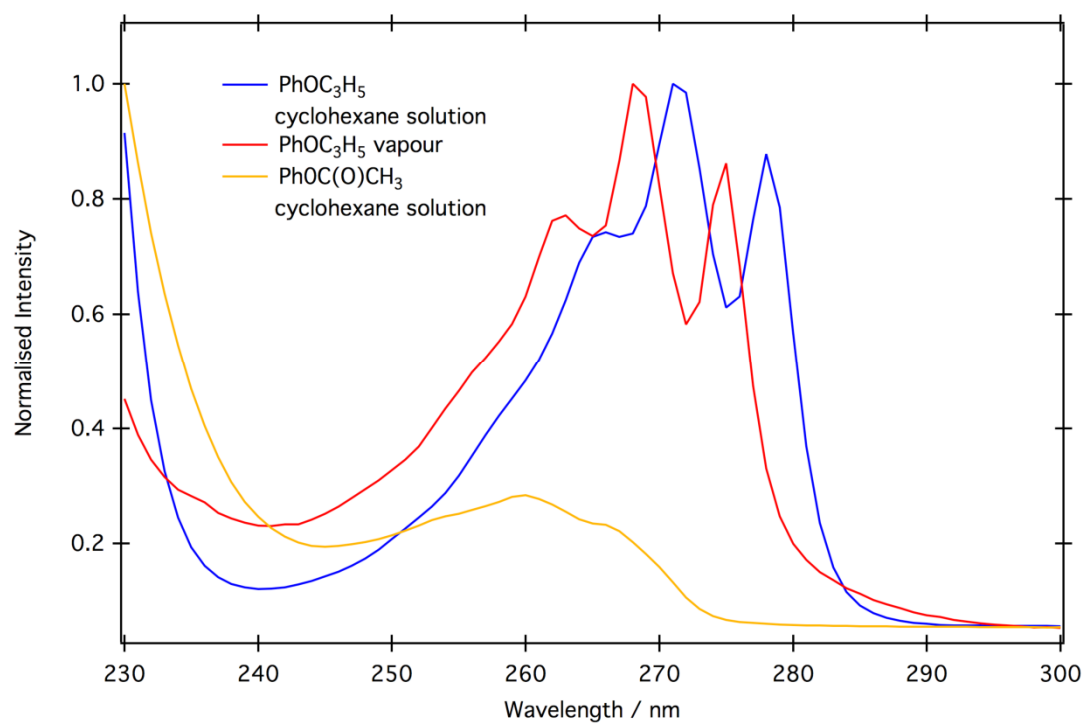

**Figure S1** – Normalised UV-visible spectra of PhOC<sub>3</sub>H<sub>5</sub> in cyclohexane solution and in the vapour phase and PhOC(O)CH<sub>3</sub> in cyclohexane solution.

**Table S1** – Calculated harmonic wavenumber and IR transition strengths of the fundamental vibrations of PhOC<sub>3</sub>H<sub>5</sub> and associated substituted cyclohexadienones. All calculations were carried out using the Gaussian 09 computer package, structures were optimised and fundamentals calculated at the B3LYP/6-311+g(d,p) level of theory.

| <b>PhOC<sub>3</sub>H<sub>5</sub></b> |                       | <b>2,4-(Allyl)cyclohexadienone</b> |                       | <b>2,5-(Allyl)cyclohexadienone</b> |                       |
|--------------------------------------|-----------------------|------------------------------------|-----------------------|------------------------------------|-----------------------|
| Wavenumber<br>(cm <sup>-1</sup> )    | Intensity<br>(km/mol) | Wavenumber<br>(cm <sup>-1</sup> )  | Intensity<br>(km/mol) | Wavenumber<br>(cm <sup>-1</sup> )  | Intensity<br>(km/mol) |
| 42.4                                 | 0.7                   | 32.9                               | 1.9                   | 44.9                               | 1.9                   |
| 72.6                                 | 0.1                   | 57.4                               | 0.8                   | 81.7                               | 1                     |
| 102.5                                | 0.3                   | 93.6                               | 0.5                   | 86.3                               | 0.2                   |
| 207.6                                | 0.4                   | 185.8                              | 3                     | 170.7                              | 2                     |
| 260.6                                | 1                     | 196.9                              | 0.7                   | 260.7                              | 1.3                   |
| 324.6                                | 7.3                   | 296.3                              | 3.9                   | 287.8                              | 1.9                   |
| 365.9                                | 0.9                   | 364.1                              | 2.3                   | 386.1                              | 0.7                   |
| 421                                  | 0                     | 433.9                              | 1.5                   | 401                                | 1.3                   |
| 511.4                                | 2.4                   | 469.4                              | 3.7                   | 460.9                              | 10.5                  |
| 518.5                                | 7.9                   | 489.6                              | 8.1                   | 475.4                              | 2.7                   |
| 558.9                                | 6.8                   | 520.1                              | 8.4                   | 522.3                              | 12.9                  |
| 626                                  | 0.4                   | 571.6                              | 3.1                   | 590                                | 1.3                   |
| 669.4                                | 7.9                   | 629.2                              | 2.5                   | 624.9                              | 10.4                  |
| 698.3                                | 23.6                  | 716.2                              | 38.2                  | 750.8                              | 4.7                   |
| 761.7                                | 69.3                  | 743.4                              | 38.2                  | 763.7                              | 0.4                   |
| 793.9                                | 13.6                  | 779.1                              | 19.1                  | 772.7                              | 4.9                   |
| 830                                  | 0.4                   | 842.9                              | 1.9                   | 812.9                              | 1.8                   |
| 896.1                                | 7.1                   | 848.6                              | 6.6                   | 878                                | 50.5                  |
| 929.1                                | 4                     | 947.2                              | 1.7                   | 897.7                              | 5.6                   |
| 961.4                                | 50.3                  | 954.9                              | 47.8                  | 930.7                              | 24.9                  |
| 972.3                                | 0.1                   | 967.3                              | 6.1                   | 952.4                              | 39.5                  |
| 982.6                                | 2.7                   | 974.8                              | 1.2                   | 955.6                              | 7.6                   |
| 989.3                                | 0.1                   | 999.6                              | 1.4                   | 1009.3                             | 4.3                   |
| 1008.9                               | 3.1                   | 1009.1                             | 2.4                   | 1020.8                             | 0.5                   |
| 1027.9                               | 43.9                  | 1020.9                             | 0.6                   | 1025.6                             | 9.2                   |
| 1034.8                               | 24.8                  | 1030.1                             | 20.1                  | 1038                               | 17.3                  |
| 1051.9                               | 57.5                  | 1045.4                             | 11.1                  | 1052.3                             | 5.2                   |
| 1105.2                               | 9.7                   | 1122.7                             | 7.3                   | 1125.9                             | 8.6                   |
| 1173.2                               | 1.5                   | 1160.6                             | 19.7                  | 1159.9                             | 7.2                   |
| 1178                                 | 5.8                   | 1196.6                             | 12.7                  | 1190.9                             | 12.1                  |
| 1196.4                               | 30.5                  | 1207.8                             | 4.7                   | 1209.8                             | 0.5                   |
| 1245.1                               | 235.1                 | 1247.9                             | 20.7                  | 1247.9                             | 2.7                   |
| 1294.3                               | 53.7                  | 1267.3                             | 2.8                   | 1272.8                             | 26.2                  |
| 1321                                 | 0.6                   | 1310.9                             | 4.8                   | 1324.2                             | 1.1                   |
| 1338.3                               | 52.7                  | 1329.6                             | 2.1                   | 1349.5                             | 2.4                   |
| 1357.1                               | 14.2                  | 1356.9                             | 11.3                  | 1372.8                             | 0.7                   |
| 1386.7                               | 2                     | 1402                               | 6.1                   | 1414.6                             | 19.2                  |
| 1459.4                               | 15.7                  | 1445.9                             | 6.3                   | 1416.2                             | 0.9                   |
| 1484.4                               | 0.9                   | 1451.3                             | 6                     | 1454.5                             | 2.8                   |

|        |       |        |       |        |       |
|--------|-------|--------|-------|--------|-------|
| 1502   | 10.1  | 1492.2 | 7.9   | 1482.8 | 9.4   |
| 1522.4 | 117.8 | 1602.3 | 38.3  | 1650.8 | 2.6   |
| 1622.8 | 25    | 1684.2 | 29.3  | 1686   | 19.5  |
| 1640.1 | 87.7  | 1697.5 | 16.8  | 1702.3 | 8.5   |
| 1701.2 | 2.5   | 1719.2 | 255.5 | 1723.4 | 385.6 |
| 3016.3 | 30.3  | 3005.5 | 0.6   | 2953.7 | 7.3   |
| 3095.9 | 17.4  | 3022.2 | 16.1  | 3010.3 | 32.3  |
| 3127.4 | 13.2  | 3091.6 | 2.9   | 3060.5 | 16.9  |
| 3151.2 | 5.8   | 3123.2 | 14.8  | 3124   | 12.1  |
| 3164.2 | 2.1   | 3130.8 | 4.2   | 3132.7 | 3     |
| 3171.5 | 11.5  | 3154.1 | 2.5   | 3135.7 | 13.4  |
| 3188   | 21.4  | 3160.7 | 11.4  | 3142.3 | 10.5  |
| 3195.4 | 9.4   | 3181.8 | 19.3  | 3181.8 | 12.8  |
| 3205.5 | 6.3   | 3190.9 | 7.1   | 3183.5 | 0.9   |
| 3213.5 | 11.8  | 3211   | 14    | 3211.3 | 12    |

---

**Table S2** – Calculated harmonic wavenumber and IR transition strengths of the fundamental vibrations of PhOC(O)CH<sub>3</sub> and associated substituted cyclohexadienones. All calculations were carried out using the Gaussian 09 computer package, structures were optimised and fundamentals calculated at the B3LYP/6-311+g(d,p) level of theory.

| <b>PhOC(O)CH<sub>3</sub></b>      |                       | <b>2,4-(Acetyl)cyclohexadienone</b> |                       | <b>2,5-(Acetyl)cyclohexadienone</b> |                       |
|-----------------------------------|-----------------------|-------------------------------------|-----------------------|-------------------------------------|-----------------------|
| Wavenumber<br>(cm <sup>-1</sup> ) | Intensity<br>(km/mol) | Wavenumber<br>(cm <sup>-1</sup> )   | Intensity<br>(km/mol) | Wavenumber<br>(cm <sup>-1</sup> )   | Intensity<br>(km/mol) |
| 24.7                              | 1.3                   | 35.3                                | 6.8                   | 34.6                                | 8.7                   |
| 63.4                              | 1.4                   | 52.3                                | 1.5                   | 55                                  | 6.7                   |
| 91.2                              | 1.9                   | 154                                 | 2.3                   | 120.7                               | 0                     |
| 116.2                             | 3.9                   | 170.8                               | 1.3                   | 171.8                               | 2.2                   |
| 263.5                             | 2.1                   | 192.8                               | 7.4                   | 183.5                               | 0.9                   |
| 327.4                             | 1.6                   | 310.7                               | 1.4                   | 326.2                               | 5                     |
| 394.1                             | 1.6                   | 339.8                               | 2.3                   | 362.3                               | 1.7                   |
| 419.3                             | 0                     | 453.9                               | 1.7                   | 384.9                               | 1                     |
| 505.9                             | 11.9                  | 464.6                               | 0.9                   | 454.9                               | 11.1                  |
| 539.7                             | 10.3                  | 490.8                               | 9.2                   | 508.8                               | 0.9                   |
| 597.3                             | 3.8                   | 536.2                               | 11.9                  | 563                                 | 20.8                  |
| 629.6                             | 0.1                   | 568.8                               | 13.3                  | 579                                 | 2.2                   |
| 671.3                             | 5.1                   | 592.8                               | 9.4                   | 593.4                               | 2.5                   |
| 698.4                             | 34.8                  | 651.5                               | 23.7                  | 643.8                               | 37.8                  |
| 758.4                             | 29.8                  | 747.7                               | 64                    | 769.1                               | 6.6                   |
| 820.9                             | 21.2                  | 789.1                               | 7                     | 777.6                               | 0.3                   |
| 837.7                             | 1.2                   | 810.4                               | 10                    | 810.9                               | 2.4                   |
| 904.3                             | 20.7                  | 868.4                               | 3.7                   | 879.4                               | 75.7                  |
| 938.7                             | 31.8                  | 948.3                               | 6.8                   | 908.5                               | 32.1                  |
| 977.5                             | 0.3                   | 977.7                               | 1.1                   | 969.3                               | 6.2                   |
| 997                               | 0.1                   | 991.8                               | 6.1                   | 986.1                               | 19.7                  |
| 1016.9                            | 41.4                  | 1003                                | 4.5                   | 1003.7                              | 4.5                   |
| 1021.9                            | 31.7                  | 1016.6                              | 24.5                  | 1022.6                              | 0.1                   |
| 1044.3                            | 17.2                  | 1022.4                              | 0.1                   | 1027.3                              | 0.1                   |
| 1063.8                            | 6.4                   | 1064.2                              | 8                     | 1067.9                              | 2.7                   |
| 1097                              | 7.7                   | 1155.7                              | 123.4                 | 1153.3                              | 86.8                  |
| 1180                              | 8.4                   | 1162.5                              | 13.9                  | 1163.5                              | 45                    |
| 1185                              | 48.4                  | 1192                                | 5.2                   | 1199.8                              | 4.8                   |
| 1211.3                            | 554.7                 | 1217.6                              | 33.1                  | 1244.1                              | 19                    |
| 1223.3                            | 97.4                  | 1238.2                              | 26.3                  | 1271.4                              | 25                    |
| 1329                              | 1.6                   | 1302.5                              | 3.9                   | 1341.5                              | 1.7                   |
| 1347.3                            | 0.9                   | 1383.7                              | 41.6                  | 1388                                | 36                    |
| 1400                              | 53.9                  | 1397                                | 11.3                  | 1408.4                              | 13.9                  |
| 1471.7                            | 15.8                  | 1441.5                              | 5.7                   | 1414.5                              | 9.4                   |
| 1476.6                            | 10.9                  | 1466.4                              | 14.5                  | 1460.2                              | 15.6                  |
| 1484.8                            | 1.9                   | 1470.4                              | 22.1                  | 1473.2                              | 13.2                  |
| 1520.5                            | 53.4                  | 1595.2                              | 50.2                  | 1645.7                              | 2.1                   |
| 1633.3                            | 18.6                  | 1677.9                              | 47                    | 1678.5                              | 2.2                   |
| 1637.9                            | 10.4                  | 1715.1                              | 273.7                 | 1721.5                              | 519.8                 |
| 1819.6                            | 251.5                 | 1790                                | 279.8                 | 1790.6                              | 224.8                 |

|        |      |        |      |        |     |
|--------|------|--------|------|--------|-----|
| 3051.4 | 1.7  | 3025.1 | 1.1  | 3020.7 | 1.3 |
| 3111.2 | 4.2  | 3033.3 | 1.8  | 3036.1 | 0.7 |
| 3157.6 | 6.8  | 3097.2 | 4    | 3096   | 3.6 |
| 3168.1 | 0.2  | 3145.6 | 8.5  | 3144.4 | 9.1 |
| 3177.3 | 8.7  | 3159.1 | 7.2  | 3145   | 6.6 |
| 3188.7 | 19.2 | 3171.3 | 1.8  | 3156   | 3   |
| 3196.9 | 6.9  | 3188.2 | 10.4 | 3184.6 | 8.5 |
| 3207.4 | 2    | 3193.5 | 5.7  | 3186.4 | 1.1 |

**Table S3** – Comparison of the experimental wavenumbers of features observed in the TVA spectrum of PhOC<sub>3</sub>H<sub>5</sub> in cyclohexane with the calculated harmonic wavenumber of the species to which they have been assigned (detailed in table S1). The numbers in brackets are the calculated values after application of a scaling factor of 0.98).

| Experimental wavenumber / cm <sup>-1</sup> | Assigned species                          | Calculated wavenumber / cm <sup>-1</sup> |
|--------------------------------------------|-------------------------------------------|------------------------------------------|
| 1415                                       | S <sub>1</sub>                            | -                                        |
| 1495                                       | S <sub>0</sub>                            | 1522 (1492)                              |
| 1516                                       | S <sub>1</sub>                            | -                                        |
| 1586                                       | S <sub>0</sub>                            | 1622 (1590)                              |
| 1598                                       | S <sub>0</sub>                            | 1640 (1607)                              |
| 1672                                       | substituted cyclohexadienone<br>(2,4/2,5) | 1719 (1685)/1723 (1689)                  |

**Table S4** - Comparison of the experimental wavenumbers of features observed in the TVA of PhOC<sub>3</sub>H<sub>5</sub> in cyclohexane with the calculated harmonic wavenumber of the species to which they have been assigned (detailed in table S2). The numbers in brackets are the calculated values after application of a scaling factor of 0.98).

| Experimental wavenumber / cm <sup>-1</sup> | Assigned species                          | Calculated wavenumber / cm <sup>-1</sup> |
|--------------------------------------------|-------------------------------------------|------------------------------------------|
| 1546                                       | -                                         | -                                        |
| 1557                                       | S <sub>1</sub>                            | -                                        |
| 1604                                       | S <sub>0</sub>                            | 1633 (1600)                              |
| 1697                                       | substituted cyclohexadienone<br>(2,4/2,5) | 1715 (1681)/1722 (1688)                  |
| 1765                                       | substituted cyclohexadienone<br>(2,4/2,5) | 1790 (1754)/1791(1755)                   |
| 1803                                       | S <sub>1</sub>                            | -                                        |
| 1820                                       | S <sub>0</sub>                            | 1820 (1784)                              |
| 1864                                       | acetyl radical                            | 1864 <sup>a</sup>                        |

<sup>a</sup> Literature experimental value; B. M. Giuliano, I. Reva, L. Lapinski, and R. Fausto, *J. Chem. Phys.*, 2012, **136**, 024505.
